# Supplementary material for: Repurposing FDA-approved sulphonamide carbonic anhydrase inhibitors for treatment of Neisseria gonorrhoeae
Source: PubMed Central journal article supplement (PMC8667909; doi:10.1080/14756366.2021.1991336), 2021-12-11
Supplement: IENZ_A_1991336_SM8024.pdf [file IENZ_A_1991336_SM8024.pdf]

## Supporting Information

### Repurposing studies of FDA-approved sulfonamide carbonic anhydrase inhibitors for treatment of *Neisseria gonorrhoeae*

Nader S. Abutaleb<sup>a</sup>, Ahmed E. M. Elhassanny<sup>a</sup>, Alessio Nocentini<sup>b</sup>, Chad S. Hewitt<sup>c</sup>, Ahmed Elkashif<sup>d</sup>, Bruce R. Cooper<sup>e</sup>, Claudiu T. Supuran<sup>b</sup>, Mohamed N. Seleem<sup>a,f,\*</sup>, Daniel P. Flaherty<sup>c,g,h\*</sup>.

<sup>a</sup> Department of Biomedical Sciences and Pathobiology, Virginia-Maryland College of Veterinary Medicine, Virginia Polytechnic Institute and State University, Blacksburg, Virginia, United States.

<sup>b</sup> Department of NEUROFARBA, Section of Pharmaceutical and Nutraceutical Sciences, University of Florence, Polo Scientifico, Firenze, Italy.

<sup>c</sup> Department of Medicinal Chemistry and Molecular Pharmacology, College of Pharmacy, Purdue University, West Lafayette, Indiana, United States.

<sup>d</sup> Department of Comparative Pathobiology, College of Veterinary Medicine, Purdue University, West Lafayette, Indiana, United States.

<sup>e</sup> Metabolite Profiling Facility, Bindley Bioscience Center, Purdue University, West Lafayette, Indiana, United States.

<sup>f</sup> Center for Emerging, Zoonotic and Arthropod-borne Pathogens, Virginia Polytechnic Institute and State University, Blacksburg, Virginia, United States.

<sup>g</sup> Purdue Institute for Drug Discovery, West Lafayette, Indiana, United States.

<sup>h</sup> Purdue Institute of Inflammation, Immunology and Infectious Disease, West Lafayette, Indiana, United States.

#### Corresponding Authors

Daniel P. Flaherty, PhD  
575 Stadium Mall Dr.  
West Lafayette, IN, USA, 47907  
ORCID: [orcid.org/0000-0002-8305-0606](https://orcid.org/0000-0002-8305-0606)  
Email: [dflaher@purdue.edu](mailto:dflaher@purdue.edu)

Mohamed N. Seleem, PhD  
1410 Prices Fork Rd.  
Blacksburg, VA, USA, 24061  
ORCID: [orcid.org/0000-0003-0939-0458](https://orcid.org/0000-0003-0939-0458)  
Email: [seleem@vt.edu](mailto:seleem@vt.edu)

**Table S1.** *N. gonorrhoeae* strains used in the study

| <i>N. gonorrhoeae</i> strains | Description                                                                                                                                                                                  |
|-------------------------------|----------------------------------------------------------------------------------------------------------------------------------------------------------------------------------------------|
| CDC 165                       | Resistant to tetracycline, penicillin, and ciprofloxacin                                                                                                                                     |
| CDC 166                       | Resistant to tetracycline, penicillin, and ciprofloxacin                                                                                                                                     |
| CDC 167                       | Resistant to azithromycin                                                                                                                                                                    |
| CDC 168                       | Resistant to tetracycline, penicillin, and ciprofloxacin                                                                                                                                     |
| CDC 169                       | Resistant to tetracycline, penicillin, and ciprofloxacin                                                                                                                                     |
| CDC173                        | Resistant to tetracycline, ciprofloxacin and penicillin                                                                                                                                      |
| CDC 178                       | Resistant to tetracycline, penicillin, and ciprofloxacin                                                                                                                                     |
| CDC 179                       | Resistant to azithromycin                                                                                                                                                                    |
| CDC 181                       | Resistant to azithromycin and tetracycline                                                                                                                                                   |
| CDC 182                       | Resistant to tetracycline, ciprofloxacin and penicillin                                                                                                                                      |
| CDC 183                       | Resistant to tetracycline, ciprofloxacin and penicillin                                                                                                                                      |
| CDC 184                       | Resistant to tetracycline, ciprofloxacin and penicillin                                                                                                                                      |
| CDC 186                       | Resistant to tetracycline, ciprofloxacin and penicillin                                                                                                                                      |
| CDC 187                       | Resistant to penicillin                                                                                                                                                                      |
| CDC 197                       | Resistant to tetracycline, penicillin, and ciprofloxacin                                                                                                                                     |
| CDC 202                       | Resistant to azithromycin                                                                                                                                                                    |
| CDC 211                       | Resistant to tetracycline, penicillin, and ciprofloxacin                                                                                                                                     |
| ATCC 700825                   | Isolated from male patient with disseminated gonococcal infection in 1983<br>Resistant to streptomycin                                                                                       |
| WHO-V                         | Isolated from a urethritis patient, Sweden, 2012                                                                                                                                             |
| WHO-W                         | Isolated in Hong Kong, 2007<br>Resistant to tetracycline, ciprofloxacin and penicillin                                                                                                       |
| WHO-X                         | Isolated in Japan, 2009<br>Resistant to tetracycline, ciprofloxacin and penicillin<br>Reduced susceptibility to ceftriaxone and cefixime                                                     |
| WHO-Z                         | Isolated from a female patient with genital infection. Australia, 2013<br><br>Penicillin, tetracycline and ciprofloxacin-resistant<br><br>Reduced susceptibility to ceftriaxone and cefixime |

**Table S2.** MICs ( $\mu\text{g/mL}$ ) against clinical *Neisseria gonorrhoeae* isolates in  $\text{CO}_2$  and ambient Non- $\text{CO}_2$  conditions.

| <i>N. gonorrhoeae</i> strains | Ethoxzolamide |                    | Acetazolamide |                    | Azithromycin  |                    | Ceftriaxone   |                    |
|-------------------------------|---------------|--------------------|---------------|--------------------|---------------|--------------------|---------------|--------------------|
|                               | $\text{CO}_2$ | Non- $\text{CO}_2$ | $\text{CO}_2$ | Non- $\text{CO}_2$ | $\text{CO}_2$ | Non- $\text{CO}_2$ | $\text{CO}_2$ | Non- $\text{CO}_2$ |
| CDC 165                       | >64           | 0.25               | >64           | 4                  | 2             | 1                  | 0.06          | 0.06               |
| CDC 166                       | >64           | 0.125              | >64           | 4                  | 1             | 1                  | 0.125         | 0.125              |
| CDC 167                       | 64            | 0.25               | >64           | 2                  | 8             | 4                  | 0.015         | 0.015              |
| CDC 168                       | 64            | 0.125              | 64            | 4                  | 1             | 1                  | 0.125         | 0.125              |
| CDC 169                       | >64           | 0.125              | >64           | 4                  | 1             | 1                  | 0.125         | 0.125              |
| CDC 173                       | 64            | 0.06               | >64           | 1                  | 1             | 1                  | 0.125         | 0.125              |
| CDC 178                       | >64           | 0.125              | >64           | 2                  | 1             | 1                  | 0.03          | 0.03               |
| CDC 179                       | >64           | 0.125              | >64           | 4                  | 8             | 4                  | 0.008         | 0.008              |
| CDC 181                       | 64            | 0.25               | >64           | 2                  | >64           | >64                | 0.015         | 0.015              |
| CDC 182                       | 64            | 0.125              | 32            | 4                  | 1             | 1                  | 0.03          | 0.03               |
| CDC 183                       | 32            | 0.06               | 32            | 2                  | 1             | 1                  | 0.06          | 0.03               |
| CDC 184                       | 32            | 0.06               | 64            | 2                  | 1             | 0.5                | 0.06          | 0.06               |
| CDC 186                       | 64            | 0.125              | 64            | 2                  | 0.5           | 0.5                | 0.06          | 0.03               |
| CDC 187                       | 64            | 0.125              | 64            | 2                  | 2             | 2                  | 0.015         | 0.015              |
| CDC 197                       | >64           | 0.25               | 64            | 4                  | 2             | 2                  | 0.015         | 0.015              |
| CDC 202                       | >64           | 0.25               | >64           | 4                  | 16            | 16                 | 0.008         | 0.008              |
| CDC 211                       | 64            | 0.25               | 64            | 1                  | 2             | 2                  | 0.03          | 0.03               |
| ATCC 700825                   | >64           | 0.125              | 64            | 0.5                | 0.125         | 0.125              | 0.008         | 0.008              |
| WHO-V                         | 32            | 0.015              | >64           | 0.5                | 16            | 16                 | 0.008         | 0.008              |
| WHO-W                         | >64           | 0.25               | >64           | 2                  | 0.25          | 0.125              | 0.06          | 0.06               |
| WHO-X                         | >64           | 0.25               | >64           | 1                  | 0.25          | 0.25               | 0.5           | 0.5                |
| WHO-Z                         | >64           | 0.5                | >64           | 4                  | 2             | 2                  | 0.5           | 0.5                |
| <b>MIC<sub>50</sub></b>       | 64            | 0.125              | >64           | 2                  | 1             | 1                  | 0.03          | 0.03               |
| <b>MIC<sub>90</sub></b>       | >64           | 0.25               | >64           | 4                  | 16            | 16                 | 0.125         | 0.125              |

MIC<sub>50</sub>: minimum inhibitory concentration at which the compound/drug inhibited 50% of the tested strains. MIC<sub>90</sub>: minimum inhibitory concentration at which the compound/drug inhibited 90% of the tested strains.

**Table S3.** Drug accumulation values in *N. gonorrhoeae* ATCC700825

|                     | <b>Accumulation (nmol/10<sup>9</sup> CFUs)</b> |               |               |                |
|---------------------|------------------------------------------------|---------------|---------------|----------------|
|                     | <b>10 min</b>                                  | <b>30 min</b> | <b>60 min</b> | <b>120 min</b> |
| <b>Tetracycline</b> | 12.5 ± 3.8                                     | 7.9 ± 1.2     | 5.0 ± 0.8     | 5.5 ± 0.3      |
| <b>AZM</b>          | 4.3 ± 0.3                                      | 5.8 ± 0.1     | 7.5 ± 0.4     | 7.7 ± 3.0      |
| <b>EZM</b>          | 17.3 ± 2.9                                     | 21.1 ± 2.2    | 20.3 ± 4.7    | 19.7 ± 4.0     |

Values represent average from two biological replicates ± S.D. Each sample contained a dose of 50 nmol/10<sup>9</sup> CFUs for each compound.
